# Specificity of Repeat-Induced Point Mutation (RIP) in *Neurospora*: Sensitivity of Non-*Neurospora* Sequences, a Natural Diverged Tandem Duplication, and Unique DNA Adjacent to a Duplicated Region

Eric J. Foss,\* Philip W. Garrett,\* John A. Kinsey<sup>†</sup> and Eric U. Selker\*

\*Institute of Molecular Biology, University of Oregon, Eugene, Oregon 97403, and <sup>†</sup>Department of Microbiology, Molecular Biology and Immunology, University of Kansas Medical Center, Kansas City, Kansas 66103

Manuscript received May 18, 1990

Accepted for publication December 20, 1990

## ABSTRACT

The process designated RIP (repeat-induced point mutation) alters duplicated DNA sequences in the sexual cycle of *Neurospora crassa*. We tested whether non-*Neurospora* sequences are susceptible to RIP, explored the basis for the observed immunity to this process of a diverged tandem duplication that probably arose by a natural duplication followed by RIP (the *Neurospora*  $\zeta$ - $\eta$  region), and investigated whether RIP extends at all into unique sequences bordering a duplicated region. Bacterial sequences of the plasmid pUC8 and of a gene conferring resistance to hygromycin B were sensitive to RIP in *N. crassa* when repeated in the genome. When the entire 1.6-kb  $\zeta$ - $\eta$  region was duplicated, it was susceptible to RIP, but was affected by it to a lesser extent than other duplications. Only three of 62 progeny from crosses harboring unlinked duplications of the region showed evidence of changes. We attribute the low level of alterations to depletion of mutable sites. The stability of the of the  $\zeta$ - $\eta$  region in strains having single copies of the region suggests that the 14% divergence of the tandem elements is sufficient to prevent RIP. DNA sequence analysis of unduplicated pUC8 sequences adjacent to a duplication revealed that RIP continued at least 180 bp beyond the boundary of the duplication. Three mutations occurred in the 200-bp segment of bordering sequences examined.

**I**N *Neurospora crassa*, as in many microorganisms, unique sequences make up the bulk of the genome. The paucity of redundant DNA may be partially due to a process that alters duplicated sequences during the sexual cycle of *N. crassa* (SELKER *et al.* 1987; SELKER and GARRETT 1988; CAMBARERI *et al.*, 1989). This process, referred to as RIP (repeat-induced point mutation), produces numerous G:C to A:T mutations in both copies of duplicated sequences during the period between fertilization and karyogamy. RIP was discovered by tracing the fate of transforming sequences. When transformants containing linked or unlinked duplications of DNA segments were passed through a cross, restriction sites in the duplicated sequences changed at high frequency. A linked duplication never survived a cross unaltered; unlinked duplications escaped RIP at a frequency of  $\approx 50\%$  (SELKER *et al.*, 1987; E. B. CAMBARERI and E. U. SELKER, unpublished data). Sequences altered by RIP were frequently found heavily methylated at cytosines. Crosses of strains that carried single copies of the tested sequences resulted in neither sequence alterations nor *de novo* methylation. Equivalent results were obtained whether the duplications were created directly by transformation or indirectly by crossing strains having homologous sequences at unlinked chromosomal locations (SELKER and GARRETT 1988; FINCHAM *et al.*, 1989).

To further explore the mechanism of RIP, we

wished to: (1) investigate if the process extends at all into unique sequences bordering a duplication, (2) determine whether the process is limited to *Neurospora* DNA, and (3) explore the apparent immunity to RIP of the heavily methylated zeta-eta ( $\zeta$ - $\eta$ ) region of Oak Ridge strains of *N. crassa* (SELKER and STEVENS 1985, 1987; SELKER *et al.* 1987). The  $\zeta$ - $\eta$  region consists of a diverged direct tandem duplication of a 0.8-kb segment including a 5S rRNA gene. Sequence comparisons of the  $\zeta$  and  $\eta$  5S rRNA regions with each other and with other 5S rRNA regions suggested that the approximately 14% divergence between the  $\zeta$  and  $\eta$  tandem repeats resulted from exclusively C:G to T:A mutations. Analysis of a related unduplicated, unmethylated sequence from *N. crassa* Abbott 4 supported this idea, and indicated that the  $\zeta$ - $\eta$  region almost certainly reflects RIP of a natural duplication (GRAYBURN and SELKER 1989). The distribution of mutated G:C base pairs in the  $\zeta$ - $\eta$  region parallels the distribution that resulted from RIP of an artificially generated duplication. The mutations occurred primarily at sites with an adenine 3' of the changed cytosine, and rarely at sites with a cytosine at this position (CAMBARERI *et al.* 1989; GRAYBURN and SELKER 89). Two explanations came to mind for the apparent immunity of the  $\zeta$ - $\eta$  region to RIP: (1) the RIP mechanism could be blind to the  $\zeta$ - $\eta$  region because of the extensive sequence divergence of the duplicate elements, or (2) all of the sensitive G:C pairs

could have already mutated. To test these possibilities we asked whether duplication of the entire  $\zeta$ - $\eta$  region would render the sequences sensitive to RIP. Our results demonstrate that this was indeed the case, but the frequency of RIP was uncharacteristically low. We conclude that the immunity to RIP of the region is a consequence of insufficient homology between the diverged repeats. The relative resistance to RIP of the reduplicated  $\zeta$ - $\eta$  region may be due to depletion of the preferred substrates for this process.

## MATERIALS AND METHODS

Pertinent information on the primary strains used is listed in Table 1. Strains were grown on Vogel's minimal medium (DAVIS and DESERRES 1970) with 2% sucrose and other supplements required to allow growth of auxotrophs. All strains tested for RIP were homokaryotic. Crosses were performed on Westergaard's medium following standard techniques (DAVIS and DESERRES 1970). DNA was isolated from *N. crassa* strains and analyzed by slot-blot and Southern hybridizations as described previously (SELKER, JENSEN and RICHARDSON 1987; SELKER *et al.* 1987).

DNA sequencing was performed on double-stranded DNA following the protocol described by KRAFT *et al.* (1988). Plasmid pEC26 was used as the template to sequence the unique sequences of pUC8 (VIERA and MESSING 1982) adjacent to the duplicated *flank* sequences of *Neurospora* transformant T-ES174-1 (T-1) that were altered by two passages through the sexual cycle. This  $\approx 4$ -kb plasmid was derived from pEC24 (CAMBARERI *et al.* 1989) by circularization of a *Hind*III fragment including essentially all of pUC8 and  $\approx 1.5$  kb of the *flank* region. The sequences reported were determined independently on both strands. To sequence out from the *flank* region, we used a 17-nucleotide primer (5'TGCTCCAGCACGATTCC) complementary to nucleotides 52-68 (numbering from the first nucleotide of the *Eco*RI site connecting pUC8 and *flank*) of the published *flank* sequence (CAMBARERI *et al.* 1989). To sequence the other strand, we used a 16-nucleotide primer (5'AACCGCCTCTCCCGC) matching pUC8 sequences 204-219 nucleotides from the *Eco*RI site. As a control for sequence alterations not associated with crossing the transformant, we sequenced the corresponding region isolated from the original transformant, T-1. For this we used pPG21 as the sequencing template. This  $\approx 3.5$ -kb plasmid was derived from pEC25 (CAMBARERI *et al.* 1989) by circularization of a fragment extending from a *Sac*I site  $\approx 0.5$  kb from the *Eco*RI site at the edge of the *flank* region to a *Sac*I site  $\approx 0.2$  kb beyond the junction of pUC8 and the *am* region (see Figure 5A). As an additional control, we sequenced a  $\approx 0.2$ -kb segment of pUC8 sequences in pEC26 and pPG21 that was most distal to the *flank* duplication (segment a in Figure 5A). This was accomplished using a 20-nucleotide primer (5'GATTGTACTGAGAGTGCACC) matching sequences  $\approx 210$ -230 bp from the *Hind*III site of pUC8.

To sequence the pUC8 DNA adjacent to the duplicated *flank* region of strains LG<sub>6</sub>;3:4, LG<sub>6</sub>;3:6, UG<sub>7</sub>;6:2 and UG<sub>7</sub>;6:4 (CAMBARERI, SINGER and SELKER 1991), we isolated the DNA region of interest after amplification using the polymerase chain reaction (PCR) with the *flank* and pUC8 primers described above. The PCR cocktails included 0.5  $\mu$ g *Neurospora* DNA, 100 pmole of each primer, 200  $\mu$ M of each deoxynucleotidetriphosphate, 1 unit "Replinas" DNA polymerase (New England Nuclear), and the buffer supplied with the polymerase. Thirty cycles of 1-min sequential incubations at 94°, 52° and 72° were performed.

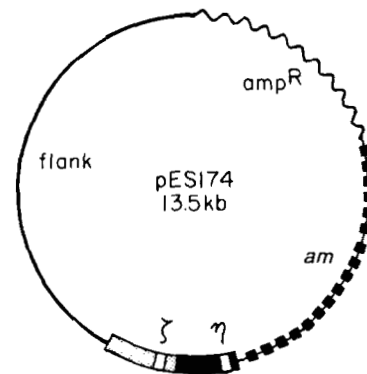

FIGURE 1.—Structure of pES174 (SELKER, JENSEN and RICHARDSON 1987). This plasmid includes the glutamate dehydrogenase gene (*am*) and adjacent sequences from *N. crassa* (heavy dashed line), the  $\zeta$ - $\eta$  region (wide solid lines), a diverged duplication of a 794-bp segment including a 5S rRNA gene (open boxes), about 6 kb of adjacent sequences (*flank*), and the bacterial sequences of pUC8 (wavy line). One degree equals 37.5 bp.

The products were then extracted with chloroform:isoamyl alcohol (49:1), precipitated with ethanol and ligated into the *Sma*I site of pBluescript SK<sup>+</sup> (Stratagene) using standard techniques. Ligation products were introduced into *Escherichia coli* strain DH5 $\alpha$ F'® (BRL) by transformation. Plasmid DNA isolated from transformants was analyzed first by restriction analysis and then by sequencing using the *flank* primer. Two independent clones were sequenced for each *Neurospora* strain. The pUC8 sequences adjacent the *flank* sequences of U-G<sub>1</sub> (CAMBARERI *et al.* 1989), which had been previously cloned (CAMBARERI *et al.* 1989), were sequenced using the pUC8 primer described above.

Southern hybridizations were performed as previously described (SELKER, JENSEN and RICHARDSON 1987). The following DNA segments were used as probes: pUC8, entire 2.7-kb plasmid (VIERA and MESSING 1982) linearized with *Eco*RI; *flank*, 4.8-kb *Eco*RI-*Bam*HI fragment from pES174 (see Figure 5A);  $\zeta$ - $\eta$  region, 0.8-kb *Bam*HI-*Bam*HI fragment from pES174 (see Figure 5A; detects entire 1.6-kb  $\zeta$ - $\eta$  region); *am* region, 2.7-kb *Bam*HI-*Bam*HI fragment from pJR2 (KINSEY and RAMBOSEK 1984; this fragment covers 2.4 kb of the *Eco*RI-*Hind*III *am* region in pES174).

## RESULTS

We used several previously characterized single-copy *N. crassa* transformants obtained with the plasmid pES174 as starting material for this study (SELKER, JENSEN and RICHARDSON 1987). This plasmid, illustrated in Figure 1, consists of bacterial sequences (pUC8), the glutamate dehydrogenase gene (*am*) of *N. crassa*, the  $\zeta$ - $\eta$  region, and approximately 6 kb of DNA adjacent to the  $\zeta$ - $\eta$  region ("*flank*"). The transformation host, N24, has a deletion (*am*<sub>132</sub>; KINSEY and HUNG 1981) that removes all of the *am* region represented in pES174, and in place of the  $\zeta$ - $\eta$  region has the unique, unmethylated theta ( $\theta$ ) region of a Mauriceville strain (SELKER, JENSEN and RICHARDSON 1987; GRAYBURN and SELKER 1989). Thus the only region of pES174 with homology in the host genome is *flank*. Previous Southern hybridization experiments suggested that this region, alone, was altered in single copy transformants, such as T-ES174-1 (T-1), T-

ES174-3 (T-3), T-ES174-5 (T-5) and T-ES174-9 (T-9) (SELKER *et al.* 1987) when they were crossed. For part of the present study we built strains harboring two copies of pES174 sequences by crossing pairs of these single-copy transformants. We then asked whether all four regions of the integrated DNA were sensitive to RIP in the duplication strains.

The transforming sequences of T-3, T-5 and T-9 had each integrated at a different position in the genome. Their chromosomal locations are unknown, except in T-5, where the sequences are linked to mating type *A*. The locations of the crossover events within the plasmids are roughly known. In both T-3 and T-5, integration occurred in the *flank* region of the plasmid, whereas in T-9 integration occurred very close to the *am-η* junction (SELKER, JENSEN and RICHARDSON 1987). To obtain strains of appropriate mating types for our experiments,  $Am^+$  progeny of crosses of T-3  $\times$  N36 (*am*<sub>132</sub>) and T-9  $\times$  N36 were selected. In Southern hybridization experiments, the *flank* region showed alterations in two out of the four progeny from each of these crosses which were analyzed, but the other regions of the plasmid remained unaltered, as expected (data not shown). The chosen strains, designated T-3' and T-9', respectively, did not show alterations in the *flank* sequences. These strains were then each crossed with T-5 to build strains with a duplication of the pUC8, *am*, and  $\zeta$ - $\eta$  sequences, and a triplication of *flank*. DNA was extracted from random isolates with the  $Am^+$  phenotype, digested with *Bam*HI, and analyzed by Southern hybridization to identify those containing the desired duplication (Figure 2). The plasmid sequences of the three transformants are associated with distinctive *Bam*HI fragments, facilitating identification of the duplication progeny. The duplication strains D:3'' + 5' and D:9'' + 5' were selected for subsequent study.

**RIP is not limited to Neurospora sequences:** Strains D:3'' + 5' and D:9'' + 5' were backcrossed to N36 to determine which sequences of pES174 were susceptible to RIP. Random progeny that contained at least one copy of the transforming DNA were identified by slot-blot hybridizations on cell lysates (data not shown). It was not important to distinguish between strains having single and double copies of pES174 since both copies could have been altered. DNA samples from progeny containing the plasmid sequences and from both parents were digested with *Sau*3A and *Mbo*I. These enzymes both recognize the sequence GATC, but *Sau*3A is sensitive to cytosine methylation, whereas *Mbo*I is not. Thus fragments that appear in *Sau*3A, but not in *Mbo*I digests are indicative of cytosine methylation, which is frequently associated with RIP. Novel *Mbo*I fragments represent changes in the DNA sequence. Southern blots were probed separately for all four regions of the plasmid and inspected for differences in restriction patterns

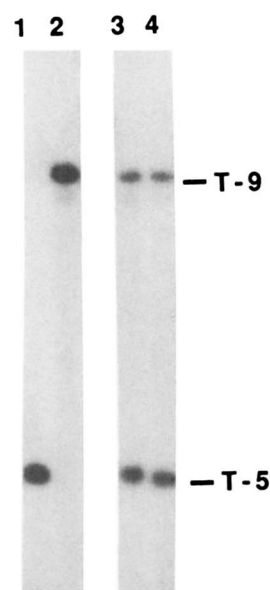

FIGURE 2.—Identification of strains containing two copies of pES174 sequences. Genomic DNA from T-5 (lane 1) and T-9' (lane 2), T-3', and progeny of these strains (lanes 3 and 4) were digested with *Bam*HI, fractionated and probed for the  $\zeta$ - $\eta$  region.

between parents and progeny indicative of RIP.

Changes in the restriction patterns of the progeny from D:9'' + 5' are evident in the autoradiograms shown in Figure 3. All but 2 (lanes b and l) of 13 progeny showed alterations of pUC8. Analysis of the cross of D:3'' + 5' produced similar results: 5 of 13 progeny showed alterations of pUC8 sequences (data not shown). We conclude that pUC8 sequences are sensitive to RIP when duplicated. Evidence of RIP was also seen in the *am* and *flank* sequences (Figure 3).

As a further test for the effect of RIP on non-*Neurospora* sequences, we tested the bacterial *hph* gene, which confers resistance to hygromycin B. We transformed strain J511 with the plasmid pDH25, which includes the *hph* gene driven by the *Aspergillus nidulans trpC* promoter (CULLEN *et al.*, 1987) and is known to function in *N. crassa* (STABEN *et al.* 1989). Hygromycin resistant transformants were made homo-karyotic by repeated isolation of microscopic single conidial colonies after streaking conidia on selective medium. They were then crossed to a (hygromycin B sensitive) wild-type strain (74A-OR23-1VA). Progeny from these crosses were screened for segregation of hygromycin B resistance. The cross of one transformant, T-hyg-1, showed apparently Mendelian segregation of hygromycin resistance; 16 of 40 progeny were resistant to the drug. In contrast, crosses of transformants T-hyg-4, -2 and -3 showed poor transmission of hygromycin resistance, transmitting the trait in 0, 2 or 6 progeny of 40 tested, respectively. When the four transformants were examined at the DNA level by Southern hybridization, using a probe for the *hph* gene, the strain that transmitted hygromycin resistance in a Mendelian way exhibited a single

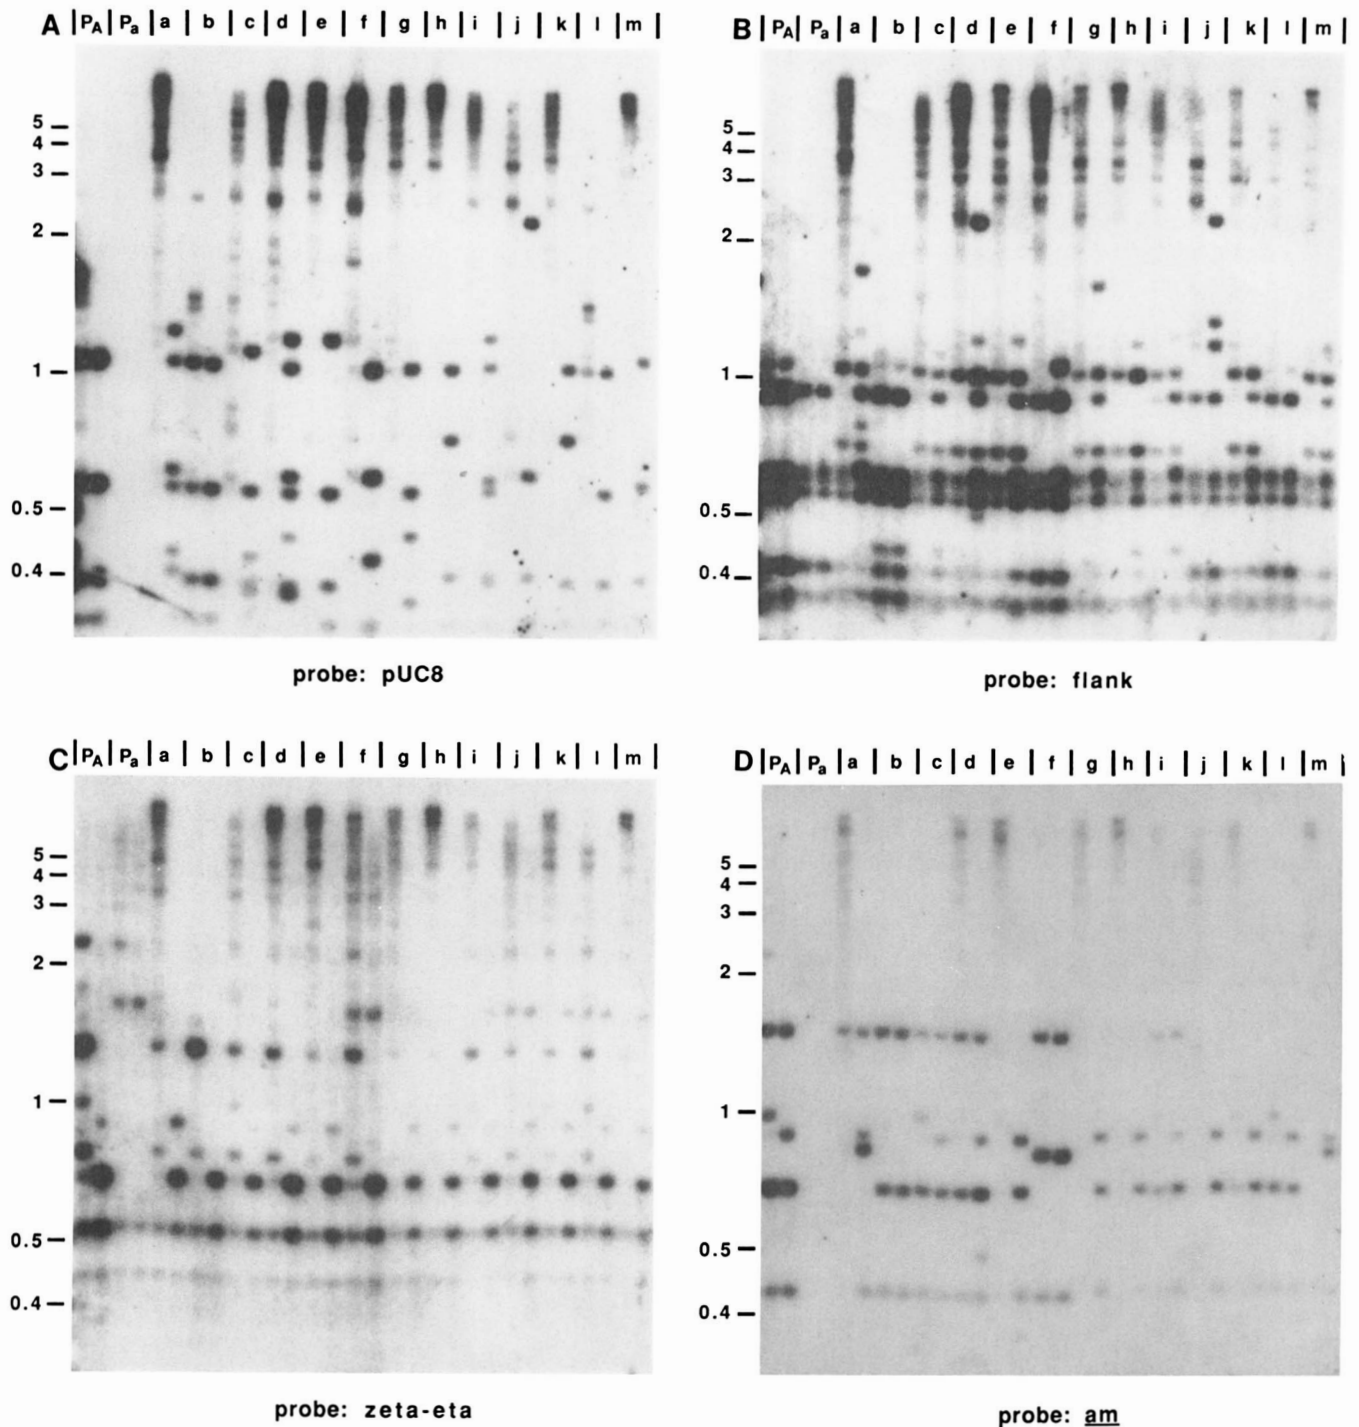

FIGURE 3.—Alterations in pES174 sequences in progeny from cross of pES174-duplication strain D:9'' + 5'. Genomic DNA (0.5 mg) of the parental strains D:9'' + 5' ( $P_A$ ) and N36 ( $P_a$ ), and their progeny (a–m), were cut with *Sau3A* or *MboI* (left and right lanes, respectively, under each heading) and probed for pUC8, *am*, the  $\zeta$ - $\eta$  region, or *flank* sequences, as indicated. Alterations in *MboI* or *Sau3A* restriction patterns of progeny DNA, relative to those of the parents, are indicative of changes in primary sequence or methylation, respectively. All regions of the plasmid except the  $\zeta$ - $\eta$  region show alterations in at least some of the progeny. The scale on the left shows sizes in kb.

band of hybridization, whereas the other strains exhibited three or four bands of hybridization (Table 1). This is consistent with loss of *hph* gene activity due to RIP in those strains with multiple copies of the gene.

**The  $\zeta$ - $\eta$  region is resistant, but not immune to RIP:** In contrast to the apparent immunity of the  $\zeta$ - $\eta$  region to RIP in crosses of T-3, T-5, T-9 and other

strains harboring single copies of this diverged tandem duplication (SELKER *et al.* 1987), alterations were observed in occasional progeny from strains having two copies of pES174 sequences, and thus two copies of the entire  $\zeta$ - $\eta$  region. Three of 52 progeny from D:3''+5' or D:9''+5' (two of thirteen from D:3''+5', and one of 49 from D:9''+5') showed changes in  $\zeta$ - $\eta$  sequences. An example is shown in Figure 4. We have

TABLE 1  
*N. crassa* strains used

| Strain      | MT | Description                     | Copy number of |                  |              |     | Source                               |
|-------------|----|---------------------------------|----------------|------------------|--------------|-----|--------------------------------------|
|             |    |                                 | pUC8           | $\zeta$ - $\eta$ | <i>flank</i> | hyg |                                      |
| 74A-OR23-1V | A  | wild-type                       | 0              | 1                | 1            | 0   | Fungal Genetics Stock Center #2489   |
| J511        | a  | <i>am</i> <sup>6</sup>          | 0              | 1                | 1            | 0   | SIDDIG <i>et al.</i> (1980)          |
| N24         | A  | <i>am</i> <sub>132</sub> parent | 0              | 0                | 1            | 0   | SELKER, JENSEN and RICHARDSON (1987) |
| N36         | a  | <i>am</i> <sub>132</sub> parent | 0              | 0                | 1            | 0   | SELKER, JENSEN and RICHARDSON (1987) |
| T-1         | A  | N24/pES174                      | 1              | 1                | 2            | 0   | SELKER, JENSEN and RICHARDSON (1987) |
| T-3         | A  | N24/pES174                      | 1              | 1                | 2            | 0   | SELKER, JENSEN and RICHARDSON (1987) |
| T-5         | A  | N24/pES174                      | 1              | 1                | 2            | 0   | SELKER, JENSEN and RICHARDSON (1987) |
| T-9         | A  | N24/pES174                      | 1              | 1                | 2            | 0   | SELKER, JENSEN and RICHARDSON (1987) |
| T-3'        | a  | F <sub>1</sub> of T-3 × N36     | 1              | 1                | 2            | 0   | T-3a in SELKER <i>et al.</i> (1987)  |
| T-9'        | a  | F <sub>1</sub> of T-9 × N36     | 1              | 1                | 2            | 0   | T-9a in SELKER <i>et al.</i> (1987)  |
| D:3'' + 5'  | A  | F <sub>1</sub> of T-3' × T-5    | 2              | 2                | 3            | 0   | This study                           |
| D:9'' + 5'  | A  | F <sub>1</sub> of T-9' × T-5    | 2              | 2                | 3            | 0   | This study                           |
| T-hyg-1     | a  | J511/pDH25                      | 0              | 1                | 1            | 1   | This study                           |
| T-hyg-2     | a  | J511/pDH25                      | 0              | 1                | 1            | 3   | This study                           |
| T-hyg-3     | a  | J511/pDH25                      | 0              | 1                | 1            | 3   | This study                           |
| T-hyg-4     | a  | J511/pDH25                      | 0              | 1                | 1            | 4   | This study                           |

no explanation for the apparent difference in sensitivity of the reduplicated  $\zeta$ - $\eta$  region in crosses of the different strains. It is clear, however, that the  $\zeta$ - $\eta$  region is sensitive to RIP when represented in the genome as two identical copies. In addition, as expected for a sequence already severely altered by RIP, it appears less sensitive to the process than virgin duplicated sequences (*i.e.*, pUC8, *am*, and *flank*).

**RIP can extend into unique sequences bordering a duplicated sequence:** In order to gain insight into the mechanism and consequences of RIP, we wished to determine whether or not RIP ever extends beyond the border of a duplication. The fact that no evidence of sequence alterations in unique DNA adjacent to duplicated sequences has been observed by Southern hybridization analyses suggested that little, if any, mutation occurs outside of the duplicated segments. To explore the range of RIP in more detail, we sequenced  $\approx 200$  bp of unique sequences adjacent to a linked duplication of *flank* in transformant T-1 (Figure 5A), and in the same region after the duplication had been passed through two generations of RIP. The sequence of the DNA rescued from the original transformant exactly matched the sequence of the original plasmid. In contrast, three mutations were found in the DNA rescued from the LG<sub>2</sub>:1:2 (CAMBARERI, SINGER and SELKER 1991), the second generation derivative of T-1 (Figure 5B). All three were polarized transitions characteristic of RIP, and

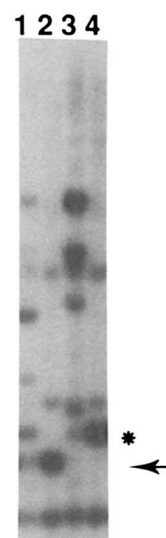

FIGURE 4.—RIP of  $\zeta$ - $\eta$  sequences. An alteration of the  $\zeta$ - $\eta$  region, detected using *Sau*3A (lanes 1 and 3) and *Mbo*I (lanes 2 and 4) in an isolate (lanes 3 and 4) from a cross of D: 3'' + 5' (lanes 1 and 2) and N36 is illustrated. The alteration is apparent from the disappearance of the band in lane 2, indicated by the arrow, and the concomitant appearance in lane 4 of the band indicated by the asterisk.

all three occurred in 5' CpA dinucleotides (5'TpG on the opposite chain), the site most susceptible to RIP (CAMBARERI *et al.* 1989; GRAYBURN and SELKER 1989). The mutations, which occurred about 20, 50 and 180 bp from the edge of the duplication all resulted in C to T changes on the chain shown. We



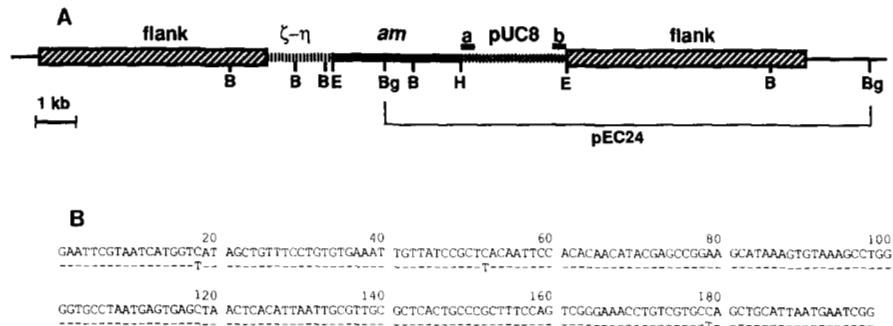

FIGURE 5.—Extension of RIP into unique sequences adjacent to a linked duplication. The pUC8 segment immediately adjacent to a duplicated copy of the anonymous chromosomal region referred to as “flank” (b in panel A), and a similar length segment located >2 kb from the duplication (a in panel A) were examined before and after crossing the strain. A map of the duplication region (from transformant T-ES174-1; SELKER, JENSEN and RICHARDSON 1987) showing key *EcoRI* (E), *HindIII* (H), *BamHI* (B) and *BglII* (Bg) sites is shown in panel A. The extent of the key plasmids used is indicated (pEC24; see MATERIALS AND METHODS). No differences were found in segment a before and after crossing, but three G:C to A:T mutations were found in segment b, as indicated in panel B under the sequence of the segment isolated from the original transformant. The sequence is numbered from the *EcoRI* site between the duplicated *flank* region and the unique pUC8 sequences.

also examined a segment of pUC8 DNA that was most distant from the duplicated region (segment a in Figure 5A). The sequence of this region in the original transformant was identical to that in the second generation derivative, both matching the known sequence of pUC8 (data not shown).

Strain LG<sub>2</sub>;1:2 was chosen to check for extension of RIP into unique sequences because the linked duplicated sequences in this strain were known to be extensively mutated (CAMBARERI *et al.* 1989). We also checked the same region in two other closely related strains (LG<sub>6</sub>;3:4 and LG<sub>6</sub>;3:6) which stemmed from the same first generation cross of T-1 that led to LG<sub>2</sub>;1:2. Examination of the 140 nucleotides immediately adjacent to the duplicated sequence in each strain revealed one mutation, common to both strains: a G to A change at position 99 in the sequence presented in Figure 5B. Like the three mutations detected in strain LG<sub>2</sub>;1:2, this change occurred in the dinucleotide sequence most susceptible to RIP. To look into the question of whether unique sequences adjacent to unlinked duplications might also be subject to spillage of RIP, we isolated and sequenced the same region from one or more progeny of pES174 transformants T-9, T-8 and T-3. Strain U-G<sub>1</sub>, the first generation derivative of T-9 (CAMBARERI *et al.* 1989), showed no mutations in the 170 nucleotides immediately adjacent to the duplicated sequence. Two seventh generation progeny of T-8, UG<sub>7</sub>;6:2 and UG<sub>7</sub>;6:4 (CAMBARERI, SINGER and SELKER 1991), each showed a C to T mutation at position 6 in the sequence presented in Figure 5B, which is the last nucleotide in the *EcoRI* site connecting the duplicated and unique sequences, but neither exhibited mutations in the adjacent 125 nucleotides of unique sequences. In contrast, strain UG<sub>7</sub>;1:6, the seventh generation derivative of T-3 (CAMBARERI, SINGER and SELKER 1991), showed a C to T mutation at position 52 in the

sequence presented in Figure 5B, one of the CpA sites that was also found changed in one of the linked duplication strains (LG<sub>2</sub>;1:2). We conclude that extension of RIP into unique sequences adjacent to duplicated sequences is not uncommon, and is not limited to linked duplications.

## DISCUSSION

The RIP process of *Neurospora* detects and mutates duplicated sequences in the period between fertilization and karyogamy. This process was discovered by following changes in restriction patterns of a 6-kb region of *Neurospora* DNA (“flank”) that is adjacent to a naturally occurring diverged duplication, the  $\zeta$ - $\eta$  region (SELKER *et al.* 1987). Analysis of the fate of the *Neurospora am* gene, when duplicated and passed through a cross demonstrated that the duplication, *per se*, renders sequences susceptible to RIP (SELKER and GARRETT 1988). We show here that this process is not limited to *Neurospora* DNA. Duplications of sequences foreign to *Neurospora* led to gene inactivation, and extensive alterations in restriction patterns in crosses. Many progeny exhibited new bands in common. Presumably each new band is due to destruction of a restriction site, or creation of a new site, by a single G:C to A:T mutation. Inspection of the *am* gene sequence (KINNAIRD and FINCHAM 1983) reveals, for example, that the new 0.78-kb *MboI* fragment detected in this region can be attributed to destruction of a single site. As expected, alterations of pUC8 sequences by RIP is frequently accompanied by cytosine methylation (SELKER *et al.* 1987; SELKER and GARRETT 1988; FINCHAM *et al.* 1989).

The  $\zeta$ - $\eta$  region is almost certainly the result of tandem duplication of a 794 bp segment including a 5S rRNA gene, followed by RIP (SELKER and STEVENS 1985, 1987; GRAYBURN and SELKER 1989). Sequence comparison of the  $\zeta$ - $\eta$  region and its presumptive

unduplicated ancestor suggested that the tandem duplication lost  $\approx 75\%$  of the G:C base pairs at sites that are most susceptible to RIP (GRAYBURN and SELKER 1989). The  $\zeta$ - $\eta$  region appears "immune" (or very resistant) to RIP except when reduplicated. This suggests that the approximately 14% divergence between the tandem elements is sufficient to prevent recognition of the duplication by the RIP machine. Curiously, after two generations of RIP, the closely linked *flank* sequences of T-ES174-1 appear more than 20% divergent (CAMBARERI *et al.* 1989; CAMBARERI, SINGER and SELKER 1991). Thus, it seems possible that the short length and/or the direct juxtaposition, of the duplicated elements of the  $\zeta$ - $\eta$  region limited RIP.

Although sensitive to RIP when it was reduplicated, the  $\zeta$ - $\eta$  region was still relatively resistant to the process. Only one out of 49 random progeny from D:9'' + 5'  $\times$  N36 and two of 13 isolates of D:3'' + 5  $\times$  N36 showed signs of RIP. It seems likely that the reason for this is that most of the readily mutable sites had already been changed.

We show for the first time in this paper that RIP can extend into unique sequences adjacent to a duplicated region. Three mutations occurred in a 200 bp segment immediately adjacent to a  $\approx 6$  kb linked duplication that had gone through two crosses. This level of mutation is considerably below that in the duplication. Nineteen mutations occurred in the first 200 bp of the duplication, and 41 occurred in the next 200 bp (CAMBARERI *et al.*, 1989). The observations that RIP can extend beyond the edge of a duplication and that G to A or C to T mutations on the two strands of some affected sequences are non-randomly distributed (CAMBARERI *et al.* 1989; M. SINGER, R. EYRE and E. SELKER, unpublished observations) are consistent with the idea that its mechanism operates in a processive manner. RIP may operate by deamination of cytosine or 5-methylcytosine residues. According to this interpretation, the three mutations detected outside of the duplication all occurred on the same strand. Curiously, the closest mutations in the adjacent duplicated region would have occurred on the opposite strand. These mutations presumably occurred in a separate round of RIP. It will be interesting to learn what is responsible for the gradual reduction in the frequency of mutations by RIP, as its machinery approaches and then passes the boundary of a duplication.

We thank BRAD KOONZE and KIRK EKENA for assistance, and ED CAMBARERI for providing plasmid pEC26. We also thank ED CAM-

BARERI and JETTE FOSS for comments on the manuscript. This work was supported by National Science Foundation grant DCB 8718163 to E.U.S. and U.S. Public Health Service grant GM23967 to J.A.K. and Basic Research Support grant S07RR05373. Part of this work was done during the tenure of an Established Investigatorship of the American Heart Association (to E.U.S.).

#### LITERATURE CITED

- CAMBARERI, E. B., M. J. SINGER and E. U. SELKER, 1991 Recurrence of repeat-induced point mutation (RIP) in *Neurospora crassa*. *Genetics* **127**: 699-710.
- CAMBARERI, E. B., B. J. JENSEN, E. SCHABTACH and E. U. SELKER, 1989 Repeat-induced G-C to A-T mutations in *Neurospora*. *Science* **244**: 1571-1575.
- CULLEN, D., S. A. LEONG, L. J. WILSON and D. J. HENNER, 1987 Transformation of *Aspergillus nidulans* with the hygromycin-resistance gene, *hph*. *Gene* **57**: 21-26.
- DAVIS, R. H., and F. J. DESERRES, 1970 Genetic and microbial research techniques for *Neurospora crassa*. *Methods Enzymol.* **17A**: 47-143.
- FINCHAM, J. R. S., I. F. CONNERTON, E. NOTARIANNI and K. HARRINGTON, 1989 Premeiotic disruption of duplicated and triplicated copies of the *Neurospora crassa am* (glutamate dehydrogenase) gene. *Curr. Genet.* **15**: 327-334.
- GRAYBURN, W. S., and E. U. SELKER, 1989 A natural case of RIP: degeneration of DNA sequence in an ancestral tandem duplication. *Mol. Cell. Biol.* **9**: 4416-4421.
- KINNAIRD, J. H., and J. R. S. FINCHAM, 1983 The complete nucleotide sequence of the *Neurospora crassa am* (NADP-specific glutamate dehydrogenase) gene. *Gene* **26**: 253-260.
- KINSEY, J. A., and B. T. HUNG, 1981 Mutation at the *am* locus of *Neurospora crassa*. *Genetics* **99**: 405-414.
- KINSEY, J. A., and J. A. RUMBOSEK, 1984 Transformation of *Neurospora crassa* with the cloned *am* (glutamate dehydrogenase) gene. *Mol. Cell. Biol.* **4**: 117-122.
- KRAFT, R., J. TARDIFF, K. S. KRAUTER and L. A. LEINWAND, 1988 Using mini-prep plasmid DNA for sequencing double stranded templates with Sequenase™. *Biotechniques* **6**: 544-547.
- SELKER, E. U., and P. W. GARRETT, 1988 DNA sequence duplications trigger gene inactivation in *Neurospora crassa*. *Proc Natl. Acad. Sci. USA* **85**: 6870-6874.
- SELKER, E. U., B. C. JENSEN and G. A. RICHARDSON, 1987 A portable signal causing faithful DNA methylation *de novo* in *Neurospora crassa*. *Science* **238**: 48-53.
- SELKER, E. U., and J. N. STEVENS, 1985 DNA methylation at asymmetric sites is associated with numerous transition mutations. *Proc Natl. Acad. Sci. USA* **82**: 8114-8118.
- SELKER, E. U., and J. N. STEVENS, 1987 Signal for DNA methylation associated with tandem duplication in *Neurospora crassa*. *Mol. Cell. Biol.* **7**: 1032-1038.
- SELKER, E. U., E. B. CAMBARERI, B. C. JENSEN and K. R. HAACK, 1987 Rearrangement of duplicated DNA in specialized cells of *Neurospora*. *Cell* **51**: 741-752.
- SIDDIG, M. A. M., J. A. KINSEY, J. R. S. FINCHAM and M. KEIGHREN, 1980 Frame shift mutations affecting the N-terminal sequence of *Neurospora* DADP-specific glutamate dehydrogenase. *J. Mol. Biol.* **137**: 125-135.
- STABEN, C., B. C. JENSEN, M. SINGER, J. POLLOCK, M. SCHECTMAN, J. KINSEY and E. U. SELKER, 1989 Use of a bacterial hygromycin B resistance gene as a dominant marker in transformation. *Fungal Genet. Newslet.* **36**: 79-81.
- VIEIRA, J., and J. MESSING, 1982 The pUC plasmids, an M13mp7-derived system for insertion mutagenesis and sequencing with synthetic universal primers. *Gene* **19**: 259-268.

Communicating editor: P. J. Pukkila
